# Supplementary material
Source: PubMed Central journal article supplement (PMC5858226)
Supplement: NIHMS943905-supplement-2.pdf [file NIHMS943905-supplement-2.pdf]

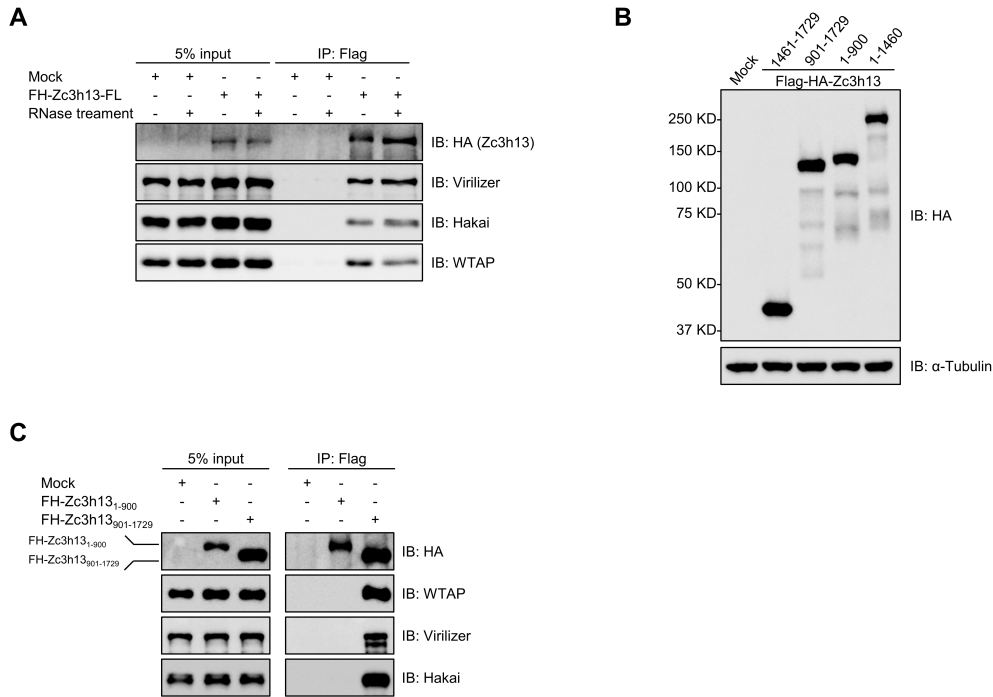

**Figure S1. Zc3h13 C-terminal domain interacts with WTAP, Hakai and Virilizer. Related to Figure 1.**

(A) Co-immunoprecipitation analysis showing Zc3h13 interacts with WTAP, Virilizer and Hakai in mESC with/without RNase treatment. Mock, mES cells transfected with empty vector; IP, immunoprecipitation; IB, immunoblotting.

(B) Western blot analysis of overexpression of the indicated truncated fragments of Zc3h13 with Flag-HA tag in mouse ESCs.  $\alpha$ -Tubulin is used as a loading control.

(C) Interactions between Zc3h13 truncated fragments (Zc3h13<sub>1-900</sub> and Zc3h13<sub>901-1729</sub>) and Virilizer, WTAP and Hakai were determined by co-immunoprecipitation. FH-Zc3h13, Flag-HA-Zc3h13; Mock, mES cells transfected with empty vector; IP, immunoprecipitation; IB, immunoblotting.

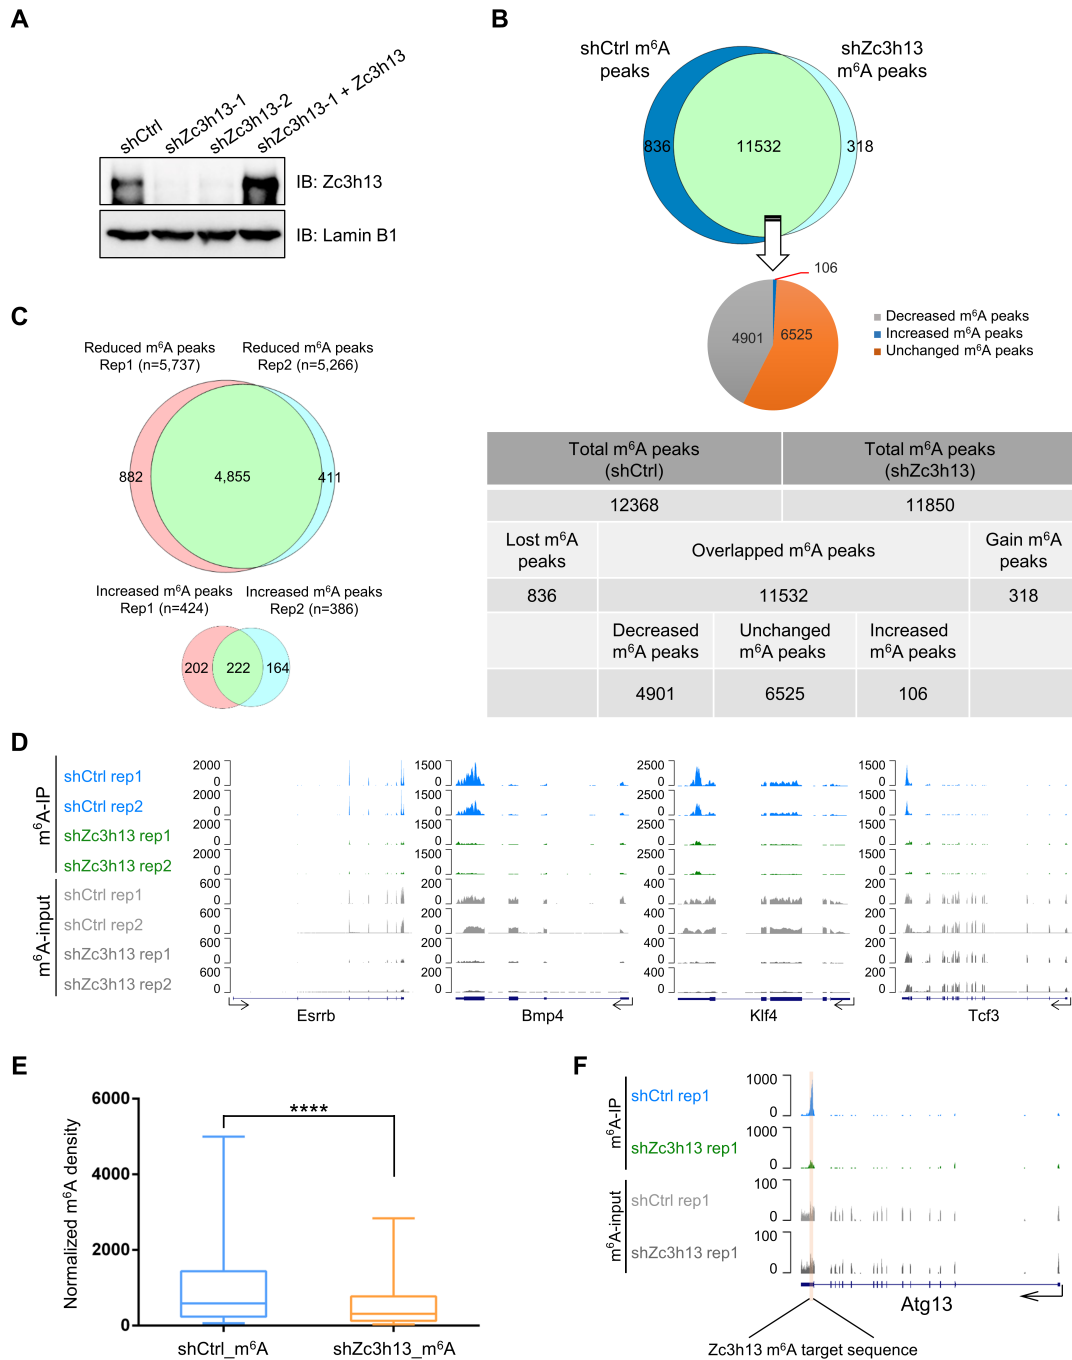

**Figure S2. MeRIP-seq data analysis of Zc3h13 kd and control mESCs. Related to Figure 2.**

(A) Western blot analysis of Zc3h13 protein levels in the indicated mES cell lines. Lamin B1 is used as a loading control. shCtrl, control.

(B) Statistics of m<sup>6</sup>A peaks from MeRIP-seq data of Zc3h13 kd and control mES cells. Venn diagram shows overlap of m<sup>6</sup>A peaks between control and Zc3h13-depleted mES cells. Pie chart depicts the number of increased, decreased and unchanged m<sup>6</sup>A peaks of above overlapping m<sup>6</sup>A peaks. The table lists m<sup>6</sup>A peak numbers, in consistent with Venn diagram and pie chart.

(C) The overlap of Zc3h13-dependent m<sup>6</sup>A peaks between two MeRIP-seq replicates.

(D) UCSC snapshots of MeRIP-seq reads along the indicated mRNAs.

(E) Box plot of normalized m<sup>6</sup>A reads density of all the m<sup>6</sup>A peaks in control and Zc3h13 kd mESCs.  
\*\*\*p < 0.0001; t test.

(F) UCSC snapshots of MeRIP-seq reads of Zc3h13 target m<sup>6</sup>A peaks on Atg13 mRNA. The region selected for minigene construction was highlighted by orange box.

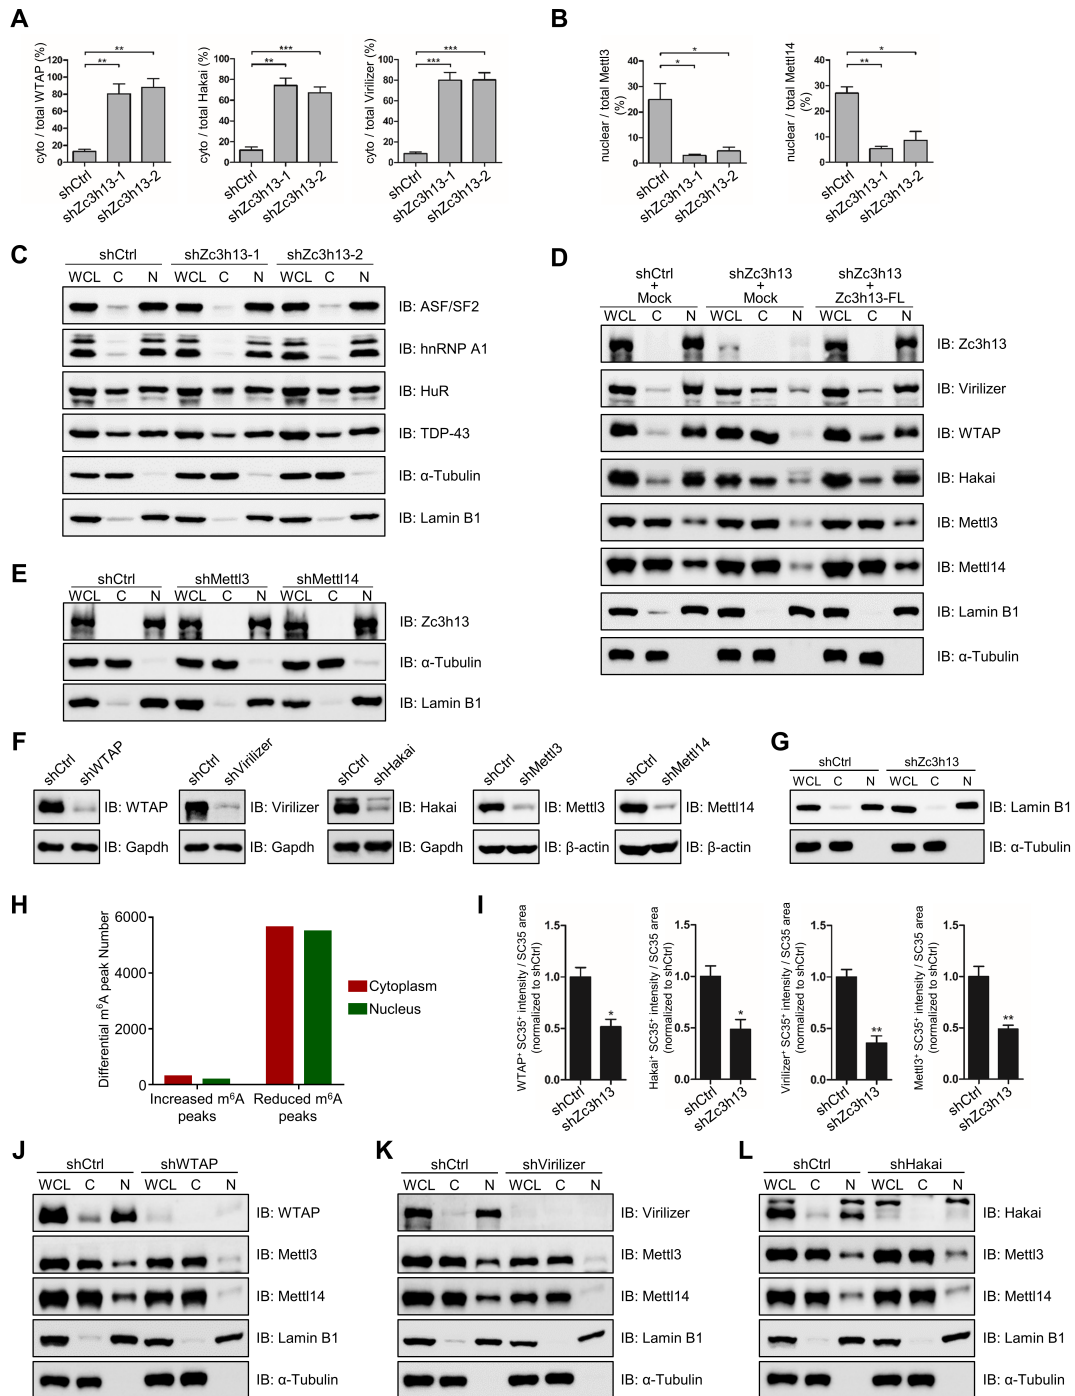

**Figure S3. Inhibition Zc3h13 complex component regulates the cellular localizations of WTAP, Virilizer, Hakai, Mettl3 or Mettl14 in mESCs. Related to Figure 3.**

(A) Western blot quantification of cytoplasmic WTAP, Virilizer and Hakai in Zc3h13 kd and control mESCs using Image Lab software. For each protein, the ratio of intensity of cytoplasmic fraction relative to whole cell lysate was displayed. Data are represented as mean  $\pm$  SEM from three biological replicates. \*\* $p < 0.01$ ; \*\*\* $p < 0.001$ ; t test.

(B) Western blot quantification of nuclear Mettl3 and Mettl14 in Zc3h13 kd and control mESCs using Image Lab software. For each protein, the ratio of intensity of nuclear fraction relative to whole cell

lysate was displayed. Data are represented as mean  $\pm$  SEM from three biological replicates. \* $p < 0.05$ ; \*\* $p < 0.01$ ; t test.

(C) Western blot analysis of cytoplasmic and nuclear fractions of hnRNP A1, ASF/SF2, HuR and TDP-43 in Zc3h13 knockdown and control mESCs.

(D) Western blot analysis of cytoplasmic and nuclear fractions of WTAP, Virilizer, Hakai, Mettl3 and Mettl14 in Zc3h13 kd, rescue and control mESCs.

(E) Western blot analysis of cytoplasmic and nuclear fractions of Zc3h13 in Mettl3 or Mettl14 knockdown and control mESCs.

(F) Western blot analysis of WTAP, Virilizer, Hakai, Mettl3 and Mettl14 knockdown efficiency in the indicated kd mES cell lines. Gapdh or  $\beta$ -actin is used as a loading control. shCtrl, control.

(G) Western blot analysis of cytoplasmic and nuclear fractions of Zc3h13 knockdown and control mESCs used for m<sup>6</sup>A LC-MS/MS and MeRIP-seq.

(H) The numbers of differential m<sup>6</sup>A peaks of cytoplasmic or nuclear fractions in Zc3h13 kd versus control mESCs.

(I) Quantification of fluorescence intensity of indicated proteins at nuclear speckles (SC35-staining region) in Zc3h13 kd and control mES cells using Image-Pro Plus software. Data are represented as mean  $\pm$  SEM from three biological replicates. \* $p < 0.05$ ; \*\* $p < 0.01$ ; t test.

(J-L) Western blot analysis of cytoplasmic and nuclear fractions of Mettl3 and Mettl14 in WTAP kd (J), Virilizer kd (K), or Hakai kd (L) mESCs and control cells.

For western blot analysis of fractionation assays (C-E, G, J-L), Lamin B1 and  $\alpha$ -Tubulin were used as nuclear and cytoplasmic markers, respectively. WCL, whole cell lysate; C, cytoplasmic fraction; N, nuclear fraction. shCtrl, control.

**A**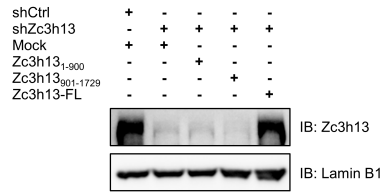**B**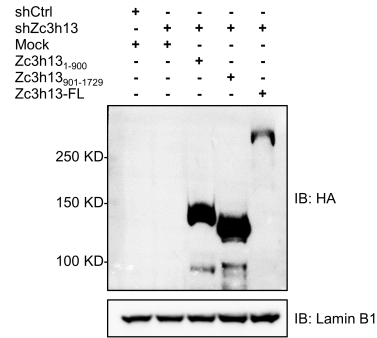**C**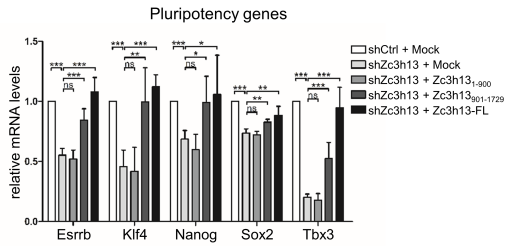**D**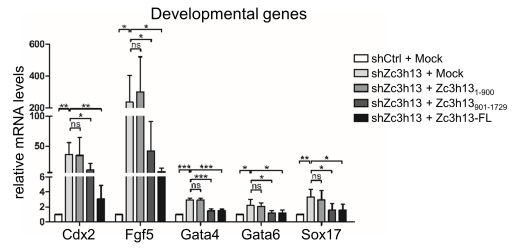**E**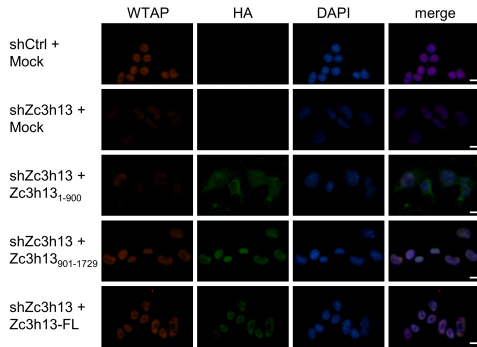**F**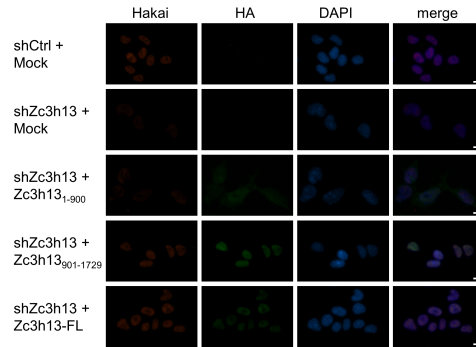**G**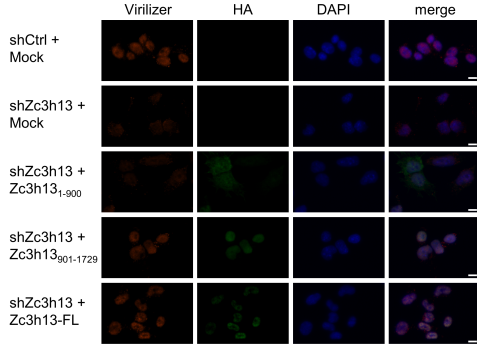**H**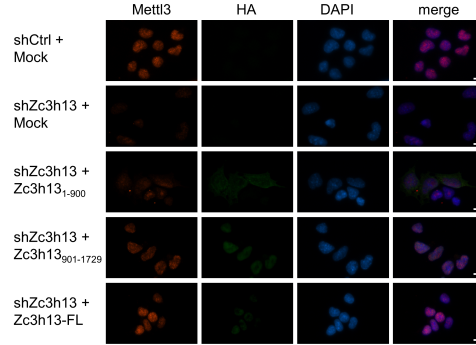**I**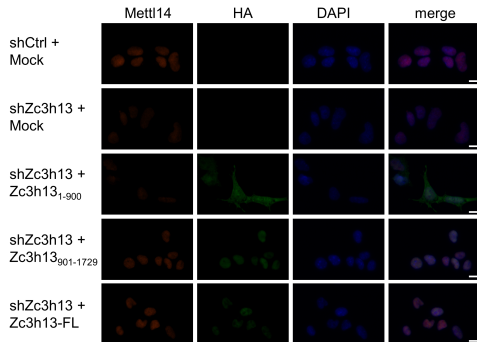**J**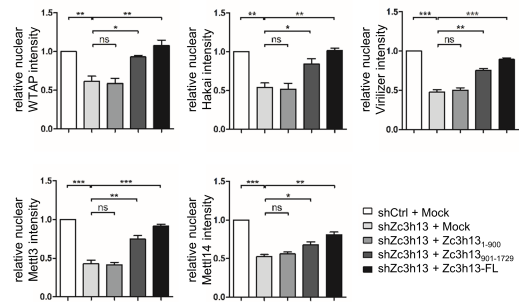

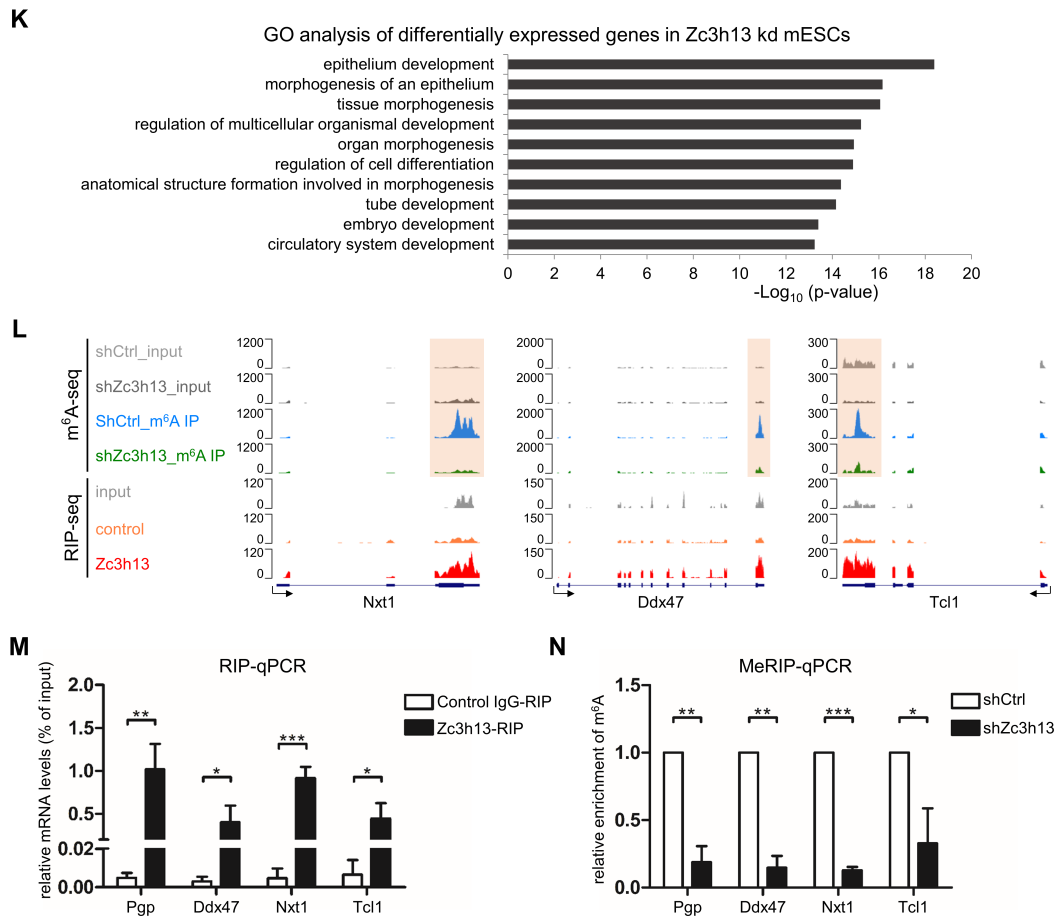

**Figure S4. C-terminal domain of Zc3h13 (aa 901-1729) significantly rescues the dampened self-renewal capacity and nuclear localization of complex components in Zc3h13 knockdown mESCs. Related to Figure 4.**

(A) Western blot analysis of Zc3h13 knockdown efficiency in the indicated mES cell lines. Lamin B1 is used as a loading control. ShCtrl, control; Mock, mES cells transfected with empty vector; FL, full length.

(B) Western blot analysis of overexpression of the indicated Zc3h13 truncations with Flag-HA tag in the indicated mESCs. Lamin B1 is used as a loading control.

(C and D) RT-qPCR analysis of pluripotency genes (C) and differentiation genes (D) in the indicated mES cell lines. Data are represented as mean  $\pm$  SD from five biological replicates. \* $p < 0.05$ ; \*\* $p < 0.01$ ; \*\*\* $p < 0.001$ ; ns, no significance; t test.

(E-I) Immunofluorescence analysis of WTAP (E), Hakai (F), Virilizer (G), Mettl3 (H), Mettl14 (I) in the indicated rescue mES cell lines. Flag-HA-Zc3h13-full length (FL), Flag-HA-Zc3h13<sub>1-900</sub>, or Flag-HA-Zc3h13<sub>901-1729</sub> were overexpressed in Zc3h13 kd mESCs, detected with WTAP (red), Hakai (red), Virilizer (red), Mettl3 (red), Mettl14 (red), HA (green, Zc3h13 constructs) antibodies and DAPI (blue, cell nuclei). Mock, mES cells transfected with empty vector. Scale bar, 10  $\mu$ m.

(J) Quantification of relative nuclear immunofluorescence intensity of indicated proteins in the indicated mES cell lines using Image-Pro Plus software. Data are represented as mean  $\pm$  SEM from three biological replicates. \* $p < 0.05$ ; \*\* $p < 0.01$ ; \*\*\* $p < 0.001$ ; ns, no significance; t test.

(K) GO biological process enrichment analysis of the 577 differentially expressed genes in Zc3h13

knockdown versus control mES cells.

(L) UCSC snapshots of MeRIP-seq and Zc3h13 RIP-seq reads along indicated mRNAs. Transcription directions are showed by arrows. UCSC ranges are shown at the left side of each track.

(M) RIP-qPCR analysis of Zc3h13 binding level of the indicated mRNAs. Data are represented as mean  $\pm$  SD from three biological replicates. \*p < 0.05; \*\*p < 0.01; \*\*\*p < 0.001; t test.

(N) MeRIP-qPCR analysis of m<sup>6</sup>A level in the indicated mRNAs in control and Zc3h13 kd mESCs. shCtrl, control. Data are represented as mean  $\pm$  SD from three biological replicates. \*p < 0.05; \*\*p < 0.01; \*\*\*p < 0.001; t test.



**Table S2. Oligonucleotides used in this study. Related to STAR Methods.**

| Gene Name                     | Primers (5'-3') |                                                                 |
|-------------------------------|-----------------|-----------------------------------------------------------------|
| <b>Zc3h13 cloning primers</b> |                 |                                                                 |
| ppB-Zc3h13                    | Forward         | ATAACCGGTATGTCAAAAATTAGGAGAAAGGTC                               |
|                               | Reverse         | ACGCGTCGACCTAGGACACACACAGCTCCTG                                 |
| ppB-Zc3h13(1-900)             | Forward         | ATAACCGGTATGTCAAAAATTAGGAGAAAGGT                                |
|                               | Reverse         | ACGCGTCGACTTATTTCTTGGACTTCTCTCCTC                               |
| ppB-Zc3h13(901-1729)          | Forward         | ACGGACCGGTCGCTATAGAAATGAAGGGAGTC                                |
|                               | Reverse         | ACGCGTCGACCTAGGACACACACAGCTCCTG                                 |
| ppB-Zc3h13(1-1460)            | Forward         | ATAACCGGTATGTCAAAAATTAGGAGAAAGGTC                               |
|                               | Reverse         | ACGCGTCGACCTACTCATGTTCACTCTCTAATTT                              |
| ppB-Zc3h13(1461-1729)         | Forward         | CGCACCGGTAGAGATCTGGAAGGCAGCTC                                   |
|                               | Reverse         | ACGCGTCGACCTAGGACACACACAGCTCCTG                                 |
| <b>shRNA primers</b>          |                 |                                                                 |
| shZc3h13-1                    | Forward         | CCGGGACACGTGCTTTGGTTTCATTTCTCGAGAAATGA<br>ACCAAAGCACGTGTCTTTTTG |
|                               | Reverse         | AATTCAAAAAGACACGTGCTTTGGTTTCATTTCTCGAG<br>AAATGAACCAAAGCACGTGTC |
| shZc3h13-2                    | Forward         | CCGGCATGAGGATAGTCAGGTATTTCTCGAGAAATAC<br>CTGACTATCCTCATGTTTTTG  |
|                               | Reverse         | AATTCAAAAACATGAGGATAGTCAGGTATTTCTCGAG<br>AAATACCTGACTATCCTCATG  |
| shWTAP                        | Forward         | CCGGGGAAAGTACACAGATCTTAATCTCGAGATTAAG<br>ATCTGTGTACTTTCCTTTTTG  |
|                               | Reverse         | AATTCAAAAAGGAAAGTACACAGATCTTAATCTCGAG<br>ATTAAGATCTGTGTACTTTCC  |
| shHakai                       | Forward         | CCGGCCATTACAATCCTAACTCTTTCTCGAGAAAGAG<br>TTAGGATTGTAATGGTTTTTG  |
|                               | Reverse         | AATTCAAAAACCAATTACAATCCTAACTCTTTCTCGAGA<br>AAGAGTTAGGATTGTAATGG |
| shVirilizer                   | Forward         | CCGGGCGTGTTTCCTTCAGCACTTGTCTCGAGACAAGT<br>GCTGAAGGAACACGCTTTTTG |
|                               | Reverse         | AATTCAAAAAGCGTGTTTCCTTCAGCACTTGTCTCGAG<br>ACAAGTGCTGAAGGAACACGC |
| shMett13                      | Forward         | CCGGCGTCAGTATCTTGGGCAAATTCTCGAGAATTTG<br>CCCAAGATACTGACGTTTTTG  |
|                               | Reverse         | AATTCAAAAACGTCAGTATCTTGGGCAAATTCTCGAG<br>AATTTGCCCAAGATACTGACG  |
| shMett14                      | Forward         | CCGGGCTGGACCTGGGATGATATTACTCGAGTAATATC<br>ATCCCAGGTCCAGCTTTTTTG |
|                               | Reverse         | AATTCAAAAAGCTGGACCTGGGATGATATTACTCGAG<br>TAATATCATCCCAGGTCCAGC  |

| <b>MeRIP-qPCR primers</b> |         |                        |
|---------------------------|---------|------------------------|
| Ndc1                      | Forward | ACTGTGTTTCATTACCCTGCTG |
|                           | Reverse | CAAGCACCACGACAAAGGAA   |
| Tbx3                      | Forward | AAATAAACCACGGGCCTTCC   |
|                           | Reverse | TTTAGTGCTCCCTCCCAGAC   |
| Naa30                     | Forward | GGAAGTACAGCAAGGAACG    |
|                           | Reverse | AACAGCTGCATGGGAATCAC   |
| Pex11b                    | Forward | CTGGCTTTGAAGTTTCGGCT   |
|                           | Reverse | TGAGCACATCCAGCAAGAGA   |
| Pgp                       | Forward | TGCGTGTCCCAGGAGTATG    |
|                           | Reverse | GTCTTCAGGCTACAGGTGGA   |
| Ddx47                     | Forward | GAAAGACTTCTGCTCGCCTG   |
|                           | Reverse | CAGGTGAGGAATGCAAGCTG   |
| Nxt1                      | Forward | CAACAAACAGCGGGACTTCA   |
|                           | Reverse | TGCTATCTTCCACACCGTGT   |
| Tcl1                      | Forward | GGTTTGCATATCCCTGGCTG   |
|                           | Reverse | CTTTGATTGCAGAGCGGTGT   |
| <b>RIP-qPCR primers</b>   |         |                        |
| Pgp                       | Forward | TGCGTGTCCCAGGAGTATG    |
|                           | Reverse | GTCTTCAGGCTACAGGTGGA   |
| Ddx47                     | Forward | GAAAGACTTCTGCTCGCCTG   |
|                           | Reverse | CAGGTGAGGAATGCAAGCTG   |
| Nxt1                      | Forward | CAACAAACAGCGGGACTTCA   |
|                           | Reverse | TGCTATCTTCCACACCGTGT   |
| Tcl1                      | Forward | GGTTTGCATATCCCTGGCTG   |
|                           | Reverse | CTTTGATTGCAGAGCGGTGT   |
| <b>RT-qPCR primers</b>    |         |                        |
| Esrrb                     | Forward | TTTCTGGAACCCATGGAGAG   |
|                           | Reverse | AGCCAGCACCTCCTTCTACA   |
| Klf4                      | Forward | CCAGCAAGTCAGCTTGTGAA   |
|                           | Reverse | GGGCATGTTCAAGTTGGATT   |
| Nanog                     | Forward | CAGGTGTTTGAGGGTAGCTC   |
|                           | Reverse | CGGTTTCATCATGGTACAGTC  |
| Oct4                      | Forward | GGCGTTCTCTTTGGAAAGGT   |
|                           | Reverse | CTTCGGGCACTTCAGAAACA   |
| Sox2                      | Forward | AAGGGTTCTTGCTGGGTTTT   |
|                           | Reverse | AGACCACGAAAACGGTCTTG   |
| Tbx3                      | Forward | AGGAGCGTGTCTGTCAGGTT   |
|                           | Reverse | GCCATTACCTCCCAATTTT    |
| Cdx2                      | Forward | GAAACCTGTGCGAGTGGATG   |
|                           | Reverse | CAGCCAGCTCACTTTTCCTC   |
| Fgf5                      | Forward | CCGGATGGCAAAGTCAATGG   |
|                           | Reverse | ACTCTCGGCCTGTCTTTTCA   |

|                                                                     |         |                                                                                                       |
|---------------------------------------------------------------------|---------|-------------------------------------------------------------------------------------------------------|
| Foxa2                                                               | Forward | ATGGGCCCAGTCACGAACAAA                                                                                 |
|                                                                     | Reverse | ACACAGACAGGTGAGACTGCT                                                                                 |
| Gata4                                                               | Forward | CCTGGAAGACACCCCAATCT                                                                                  |
|                                                                     | Reverse | TTAATGAGGGGCGGTTGAT                                                                                   |
| Gata6                                                               | Forward | TTCTACACAAGCGACCACCT                                                                                  |
|                                                                     | Reverse | CACCAAGAATCCTGTGCGCAC                                                                                 |
| Sox17                                                               | Forward | CACAACGCAGAGCTAAGCAA                                                                                  |
|                                                                     | Reverse | CGCTTCTCTGCCAAGGTC                                                                                    |
| Eomes                                                               | Forward | CAGGCGCATGTTTCCTTTCT                                                                                  |
|                                                                     | Reverse | ATCTCCTGCCTCATCCAGTG                                                                                  |
| T                                                                   | Forward | ACCCAGCTCTAAGGAACCAC                                                                                  |
|                                                                     | Reverse | GCTGGCGTTATGACTCACAG                                                                                  |
| Gapdh                                                               | Forward | CTGCGACTTCAACAGCAACT                                                                                  |
|                                                                     | Reverse | GAGTTGGGATAGGGCCTCTC                                                                                  |
| <b>Zc3h13 target m<sup>6</sup>A sequence for minigene reporters</b> |         |                                                                                                       |
| Atg13 fragment inserted into minigene reporter (wt)                 |         | CACCCTTTGTGAAGCAGCTGAGGACAGTCCTTGCTGAGGCTCTGTTACAGCCAGCTTCCAGCTCGACGGCCCCGAGTCCCTCGCCAAGTCCGGCACTGGGC |
| Atg13 fragment inserted into minigene reporter (Mutant)             |         | CTCCCTTTGTGTTGCTGCTGTGGTCTGTCCTTGCTGTGGCTCTGTTTCTGCCTGCTTCCTGCTCGTCGGCCCCGTGTCTCGCCTTGTCGGCTCTGGGC    |
| <b>MeRIP-qPCR primers for minigene reporters</b>                    |         |                                                                                                       |
| Atg13                                                               | Forward | AAGCTTCGATTAGTGAACGGA                                                                                 |
|                                                                     | Reverse | AAGATCTCTGTCTCGAGCCG                                                                                  |
